# Supplementary material for: Processing of eukaryotic Okazaki fragments by redundant nucleases can be uncoupled from ongoing DNA replication in vivo
Source: PubMed Central journal article supplement (PMC6393292; doi:10.1093/nar/gky1242), 2018-12-12
Supplement: gky1242_supplemental_files.pdf [file gky1242_supplemental_files.pdf]

# Kahli, Osmundson et al., Figure S1

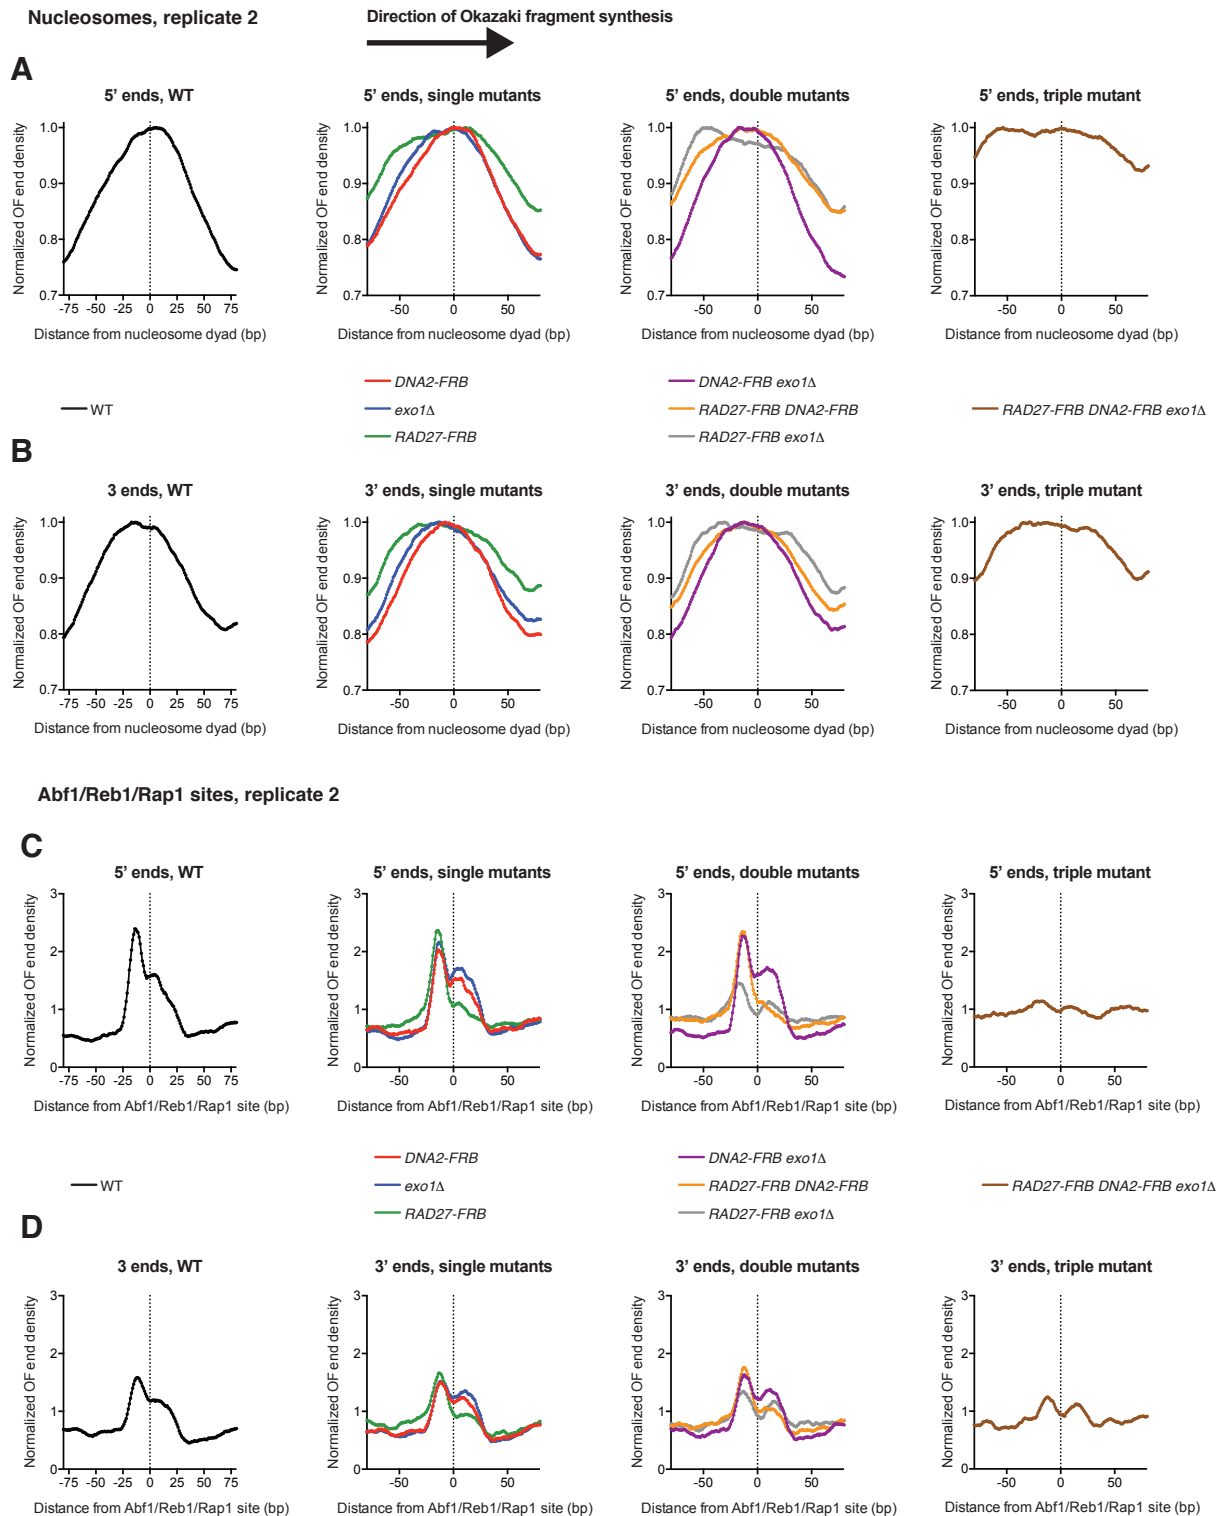

**Figure S1. Sequencing data replicate comparisons**

- A.** Distribution of Okazaki fragment 5' termini around nucleosome dyads, as in Fig. 2A, for a second biological replicate of each strain.
- B.** Distribution of Okazaki fragment 3' termini around nucleosome dyads, as in Fig. 2B, for a second biological replicate of each strain.
- C.** Distribution of Okazaki fragment 5' termini around Abf1/Reb1/Rap1 sites, as in Fig. 3A, for a second biological replicate of each strain.
- D.** Distribution of Okazaki fragment 3' termini around Abf1/Reb1/Rap1 sites, as in Fig. 3B, for a second biological replicate of each strain.

Kahli, Osmundson et al., Figure S2

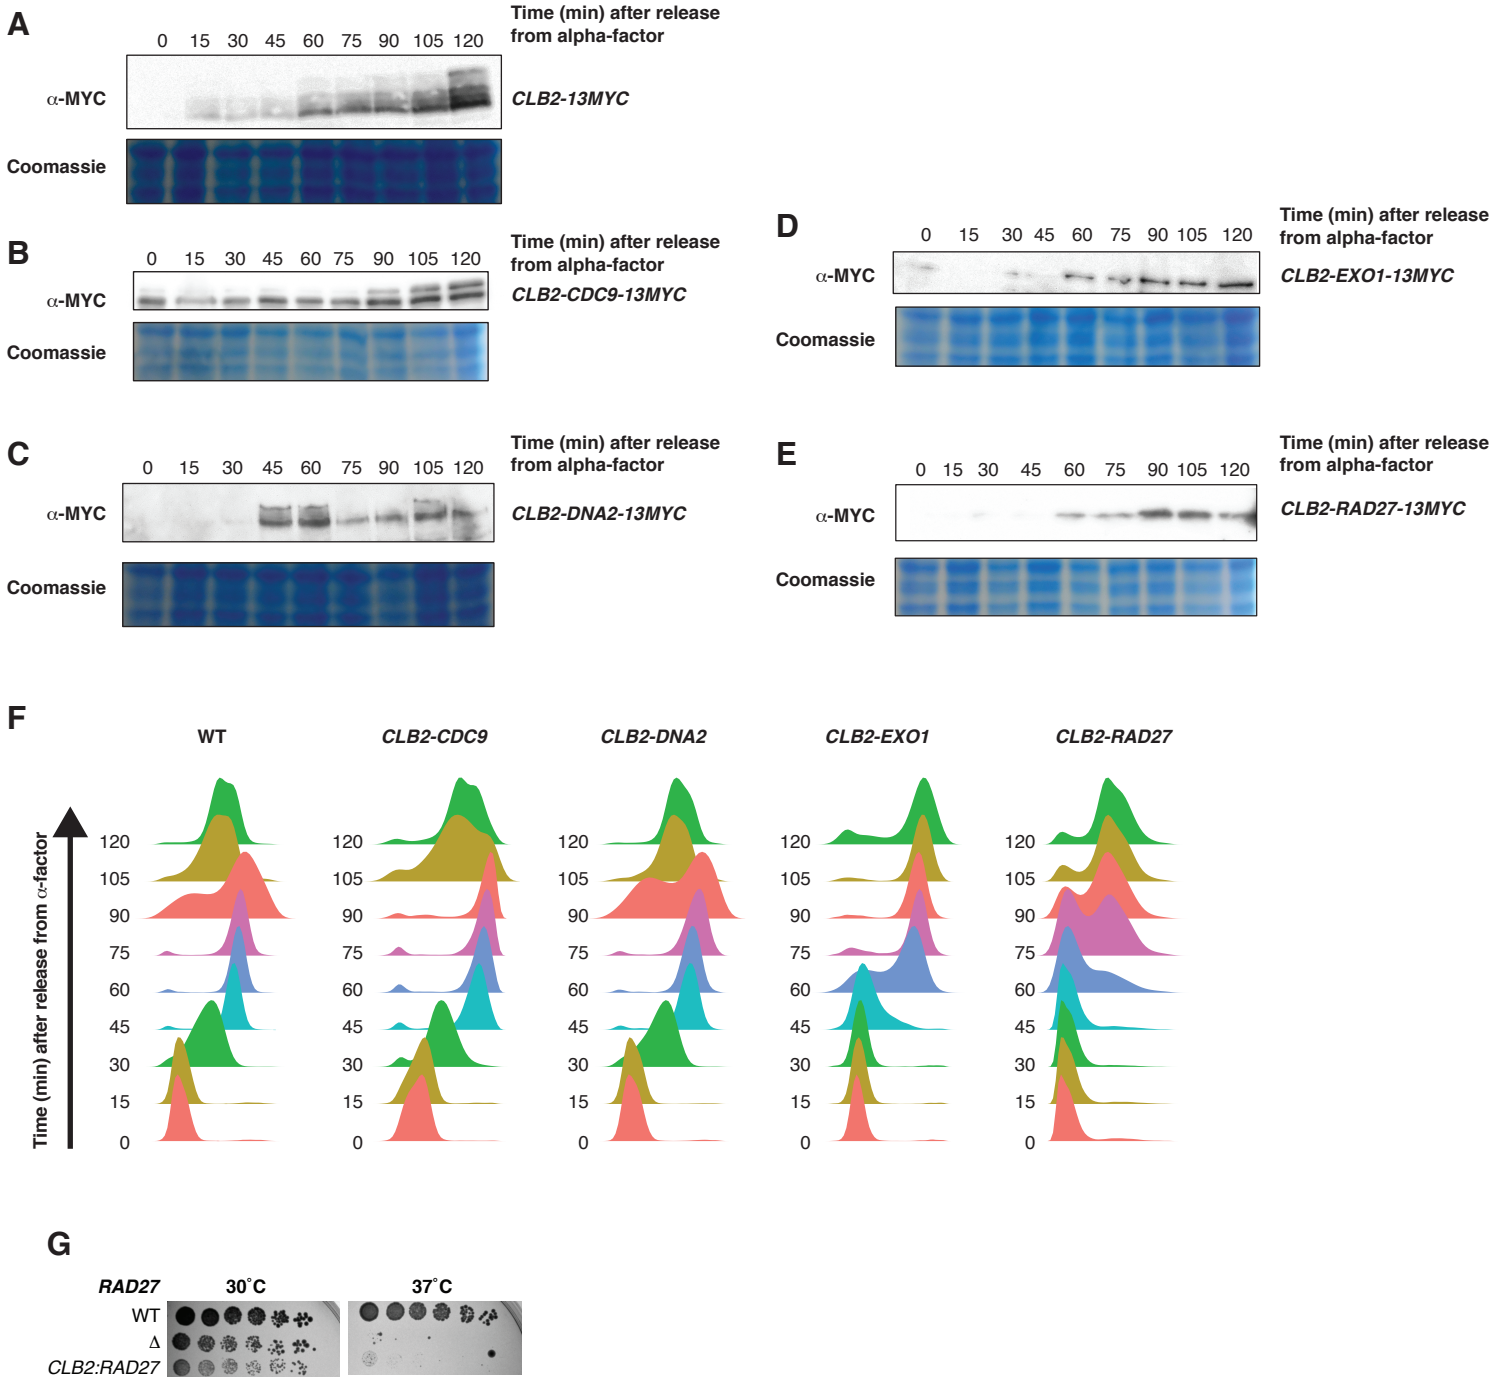

**Figure S2. Expression and cell-cycle analysis for strains expressing Clb2-regulated Okazaki-fragment processing enzymes**

**A-E.** Anti-Myc Western blots from strains released from alpha-factor arrest for the indicated time. *CLB2* (A), *CLB2-CDC9* (B), *CLB2-DNA2* (C), *CLB2-EXO1* (D) or *CLB2-RAD27* (E) were C-terminally tagged with 13xMyc. Identically loaded Coomassie-stained gels are shown as loading controls. The lower band in (B) represents the mitochondrial isoform of Cdc9, which uses a distinct translational start site and does not cycle.

**F.** DNA content, assayed by flow cytometry, for samples analyzed in Fig. S2A-E

**G.** Spot tests on YPD at 30°C or 37°C, as indicated, comparing the growth of WT, *rad27* $\Delta$  and *CLB2-RAD27* cells.
